# Supplementary material
Source: publisher site journal article supplement (https://www.dovepress.com/article/270590)
Supplement: Supplementary file 1 [file get_supplementary_file.php]

**Table S1.** Subgroup analysis and interaction test between covariates and time interval on infectious morbidity.

| Time interval a | N | Infectious morbidity  OR (95%CI) P-value |
| --- | --- | --- |
|  |  |  |
| Stage |  |  |
| HSIL | 537 | 0.99 (0.97, 1.00) 0.1302 |
| Invasive cancer  P interaction | 635  0.8466 | 0.98 (0.97, 1.00) 0.0318 |
| Surgical approach |  |  |
| Vaginal | 145 | 0.99 (0.97, 1.01) 0.4233 |
| Laparoscopic | 685 | 0.97 (0.95, 0.99) 0.0082 |
| Open  P interaction | 342  0.0411 | 0.99 (0.98, 1.01) 0.1989 |
| Operative time(min) |  |  |
| <180 | 803 | 0.99 (0.98, 1.00) 0.0650 |
| ≥180  P interaction | 369  0.8250 | 0.99 (0.97, 1.00) 0.1436 |
| Estimated blood loss(ml) |  |  |
| <300 | 1042 | 0.99 (0.98, 1.00) 0.0122 |
| ≥300  P interaction | 130  0.7877 | 0.99 (0.96, 1.02) 0.5671 |

HSIL: High grade cervical intraepithelial neoplasia;

Each stratification adjusted for all the factors (stage, surgical approach, operative time and estimated blood loss) except the stratification factor itself.

a Time interval was analyzed as continuous variable.

OR: odds ratio; CI: confidence interval; P< 0.05 was considered significantly important.


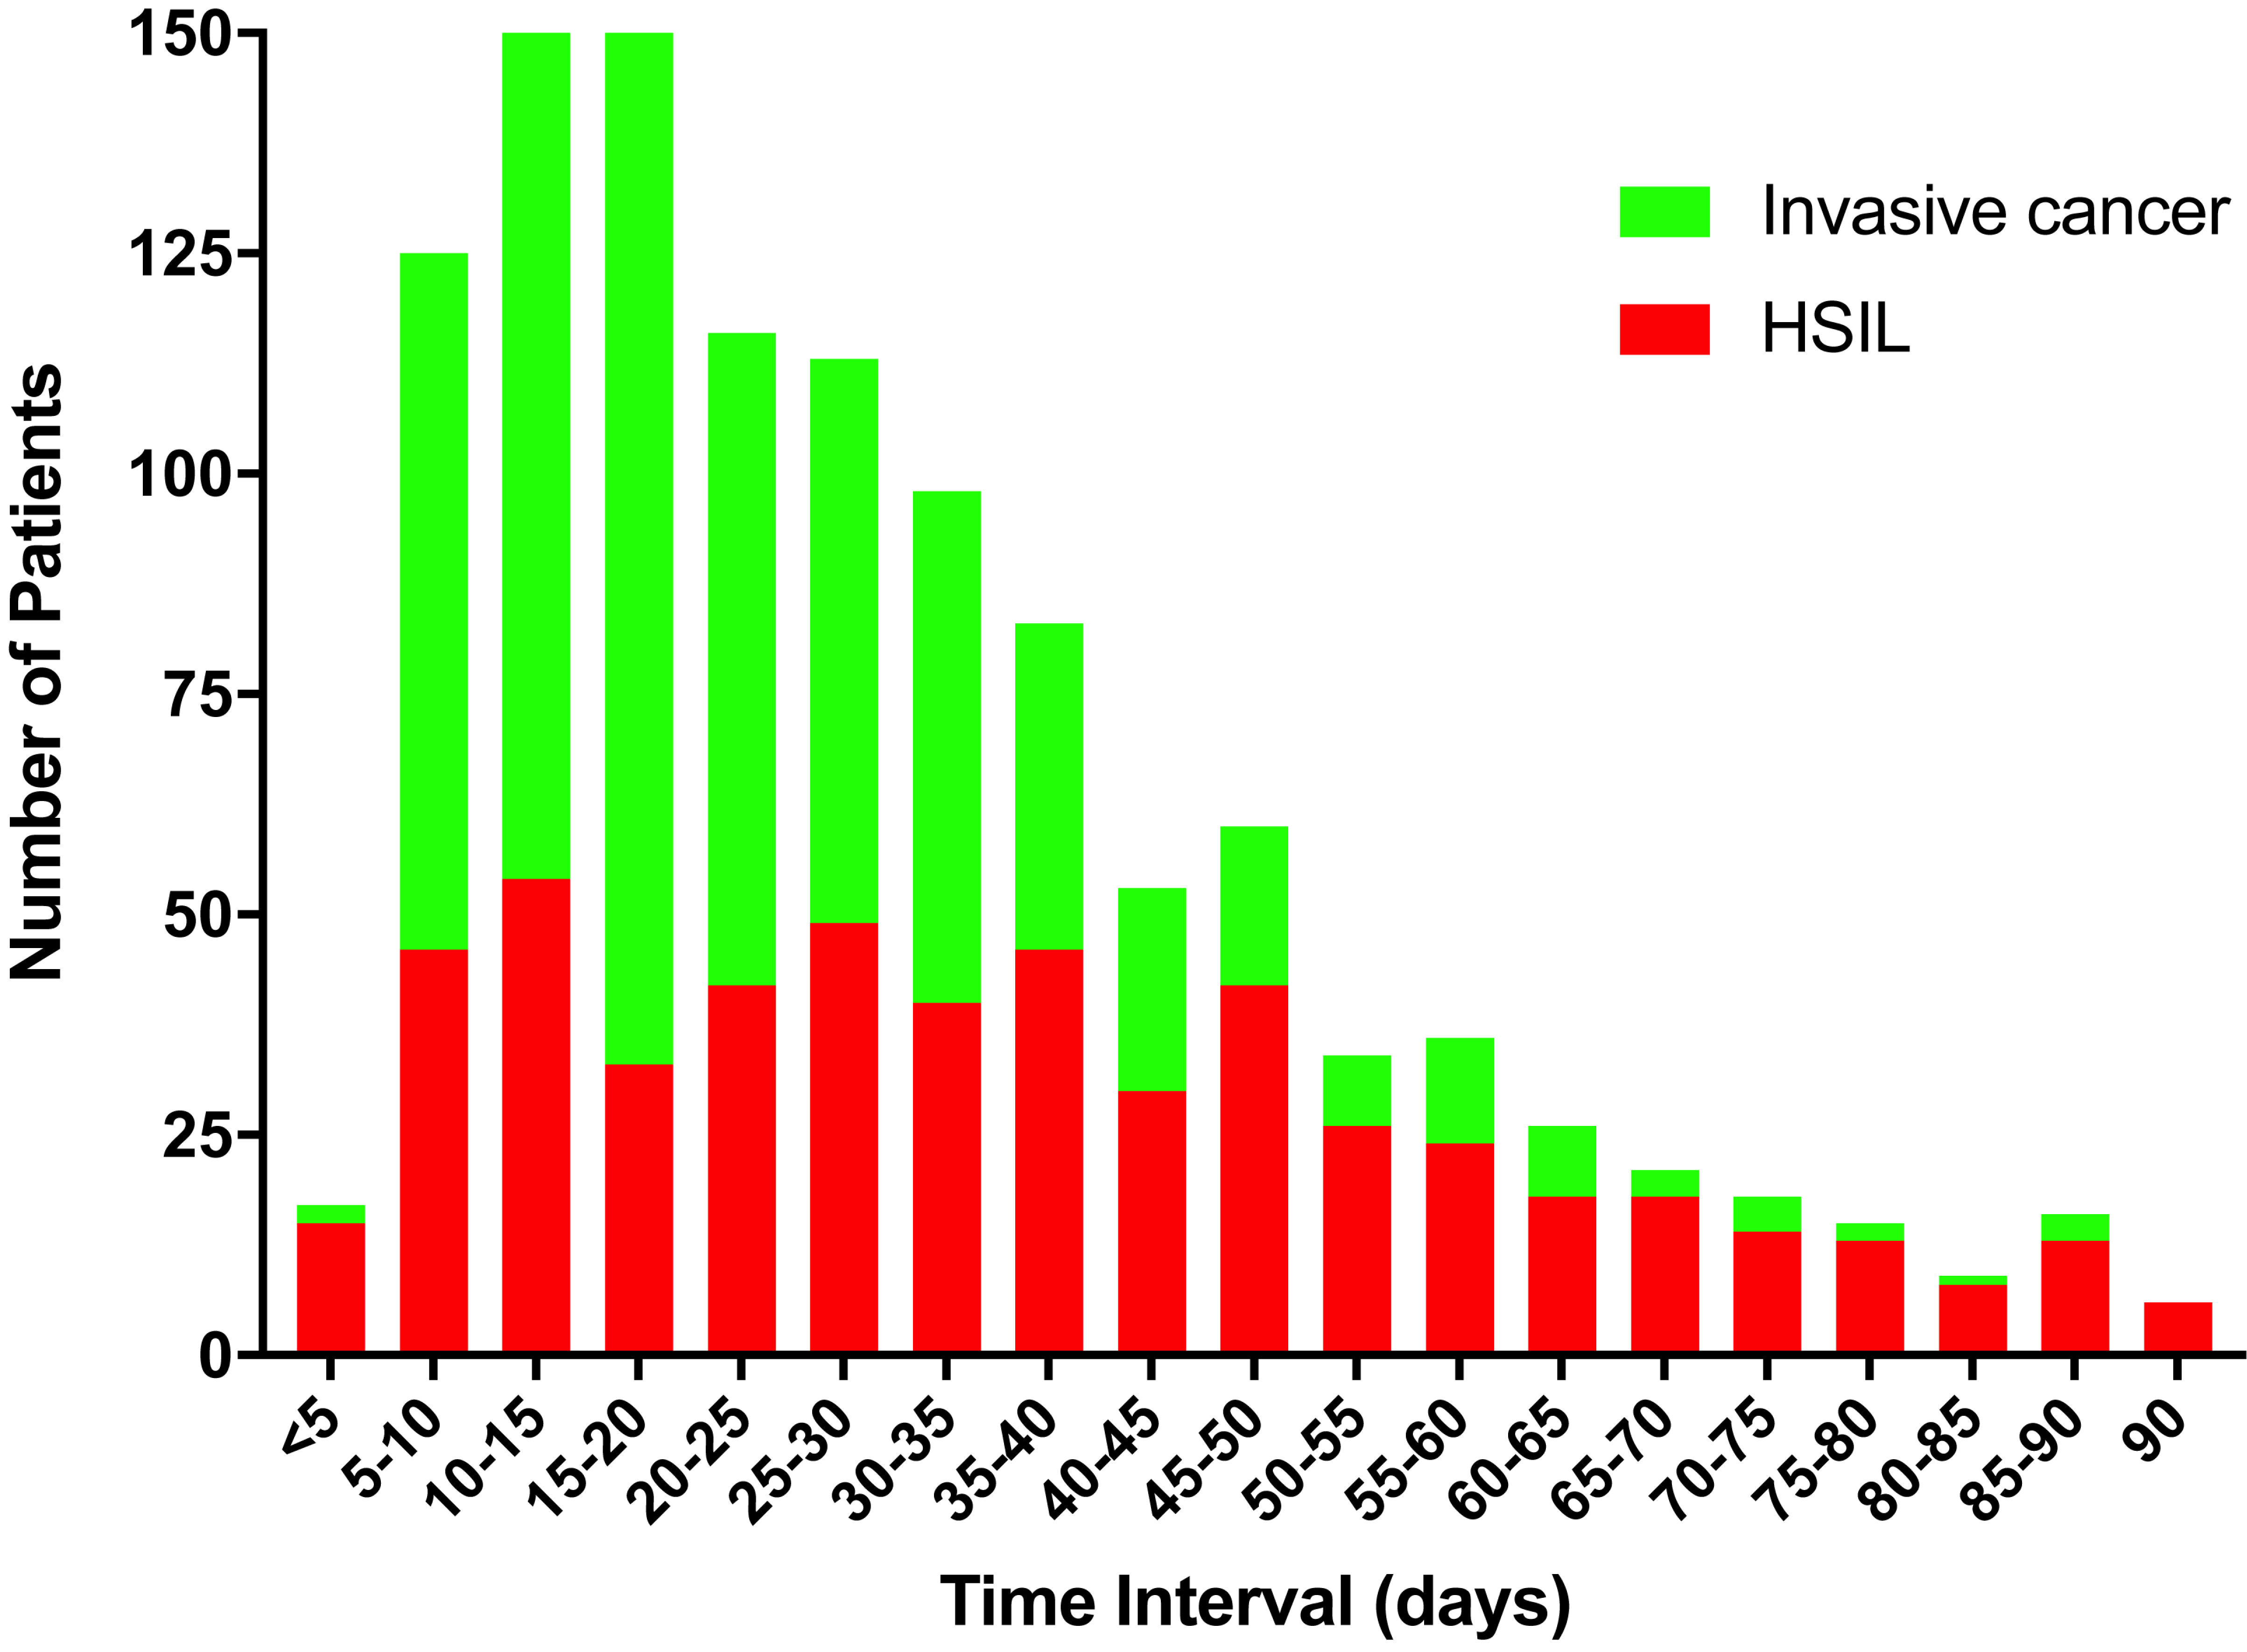


**Figure S1.** The distribution of time interval between loop electrosurgical excision procedures (LEEP) and subsequent hysterectomy for our population by cancer stage.
